# Supplementary material for: Myo-Inositol Reverses TGF-β1-Induced EMT in MCF-10A Non-Tumorigenic Breast Cells
Source: MDPI journal article supplement (doi:10.3390/cancers15082317), 2023-04-15
Supplement: s1 [file s1]

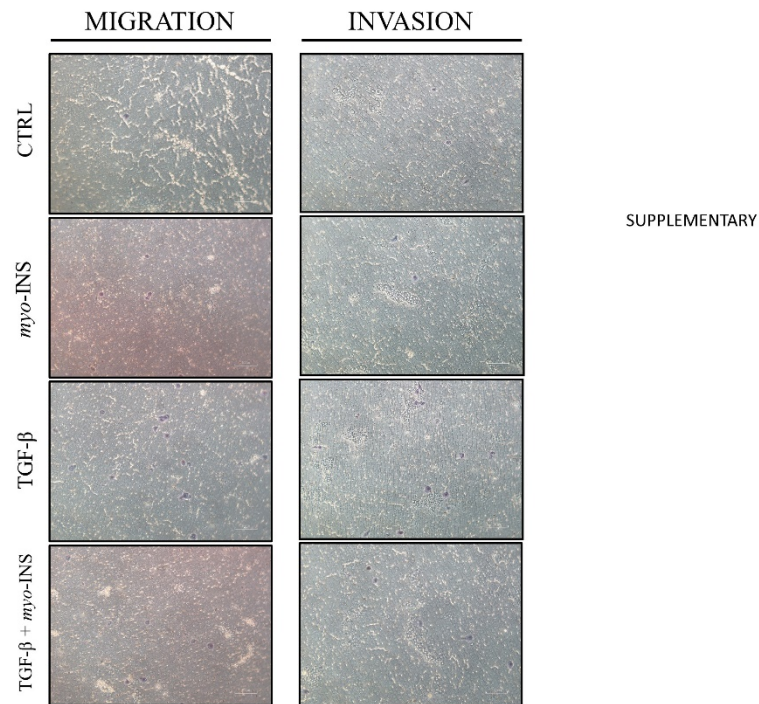

**Figure S1.** *Myo-inositol inhibits motility and invasiveness upon TGF- $\beta$ 1 induction.* Micrographs are representative of MCF-10A cells migration and invasion transwell assays. Scale bars: 100  $\mu$ m.

Table S1. List of Primers used

| GENE          |    | SEQUENCE                         |
|---------------|----|----------------------------------|
| <b>E-cad</b>  | FW | 5' – GAGGGGTTAAGCACAACAGC – 3'   |
|               | RV | 5' – GCACCTGACCCTTGTACGTG – 3'   |
| <b>N-cad</b>  | FW | 5' – GAGGCTTCTGGTAAAATCGC – 3'   |
|               | RV | 5' – AGAAGAGGCTGTCCTTCATGC – 3'  |
| <b>COL1A1</b> | FW | 5' – GCCAAGACGAAGACATCCCA – 3'   |
|               | RV | 5' – CAACACCTTGCCGTTGTCG – 3'    |
| <b>FN</b>     | FW | 5' – GAGCTATTCCTGCACCTGA – 3'    |
|               | RV | 5' – CGTGCAAGGCAACCACACT – 3'    |
| <b>PI3K</b>   | FW | 5' – AGGGTGCTAAAGAGGAACACTG – 3' |
|               | RV | 5' – CTGGCCAAAGATTCAAAGCCA – 3'  |
| <b>SNAI1</b>  | FW | 5' – TGGTTCTTCTGCGCTACTGC – 3'   |
|               | RV | 5' – TTAGGCTCCGATTGGGGTC – 3'    |

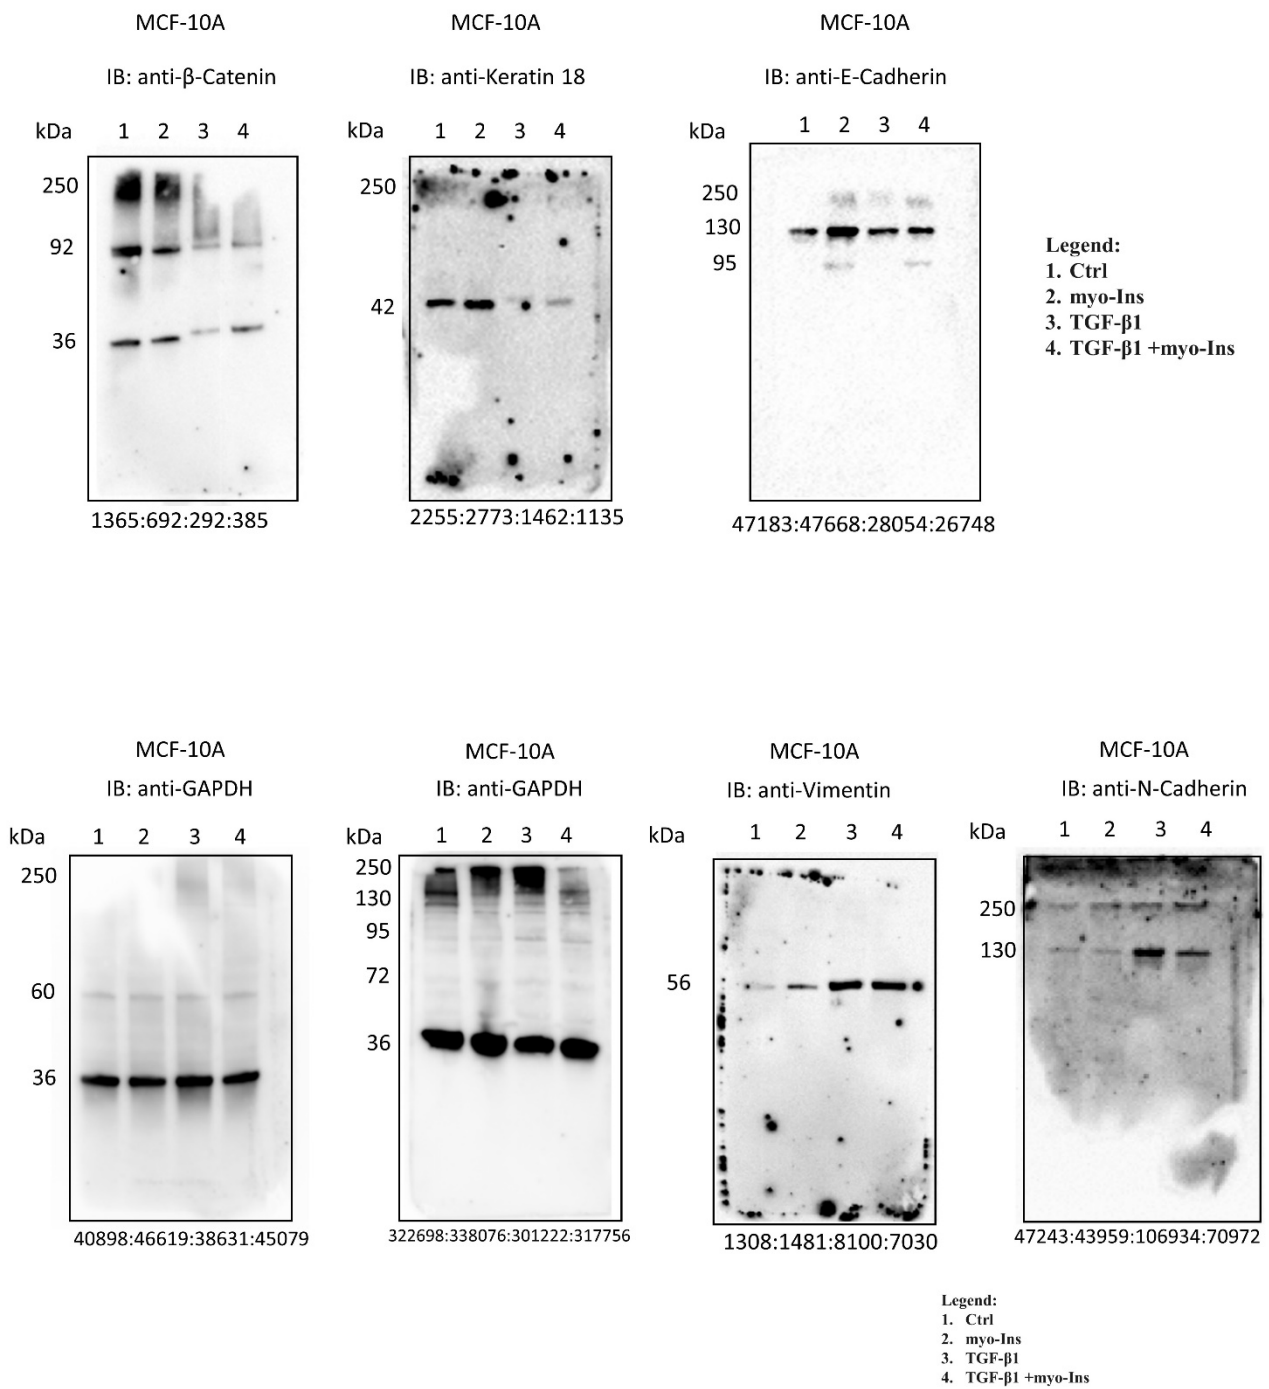

Figure S2. Whole of western blot assays.
